# Supplementary material
Source: PubMed Central journal article supplement (PMC404034)

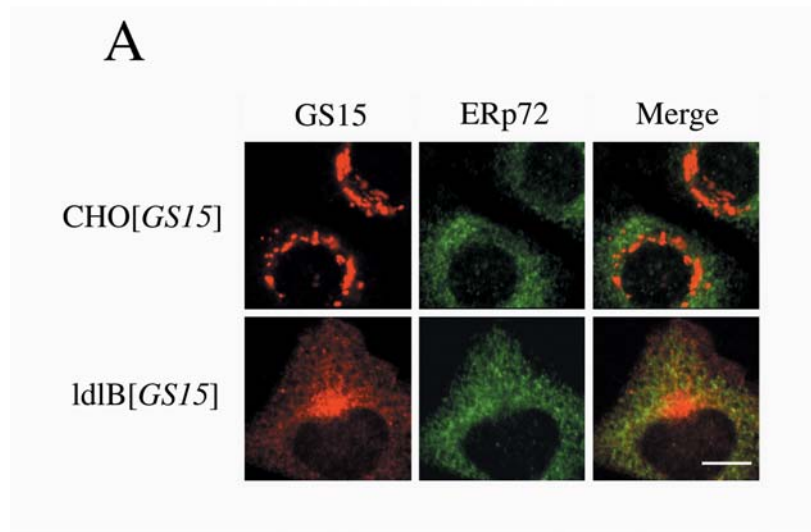

**B**

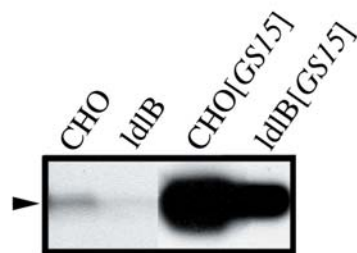

Supplement: mbc_15_5_2423__1.pdf [file mbc_15_5_2423__1.pdf]

A

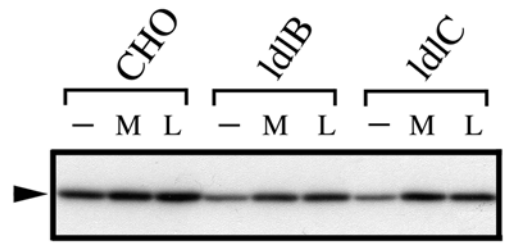

B

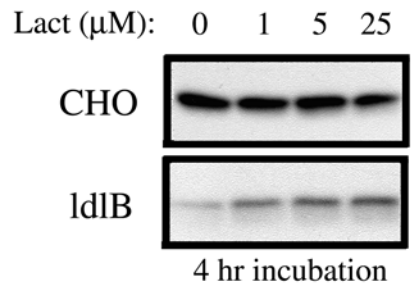

Supplement: mbc_15_5_2423__2.pdf [file mbc_15_5_2423__2.pdf]

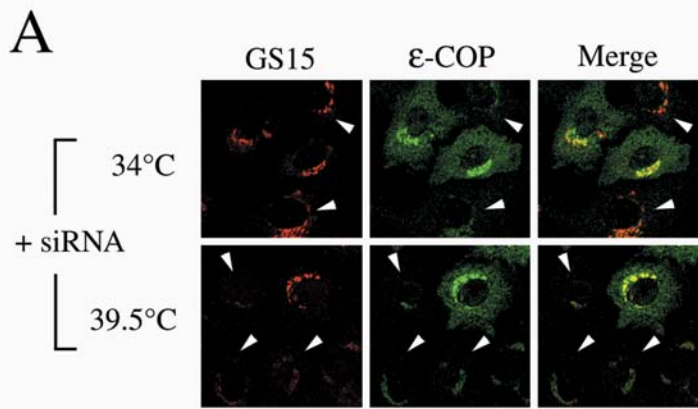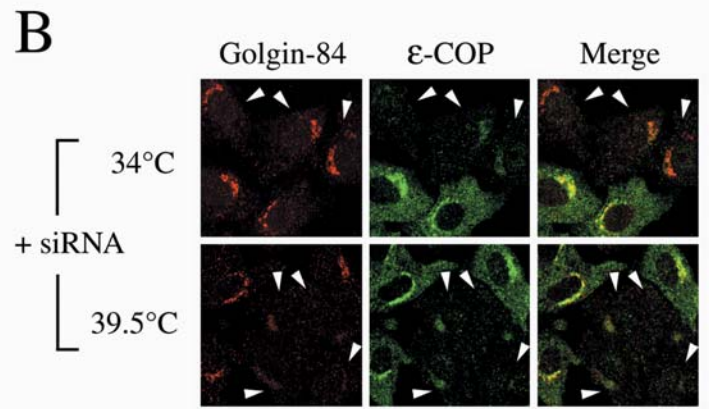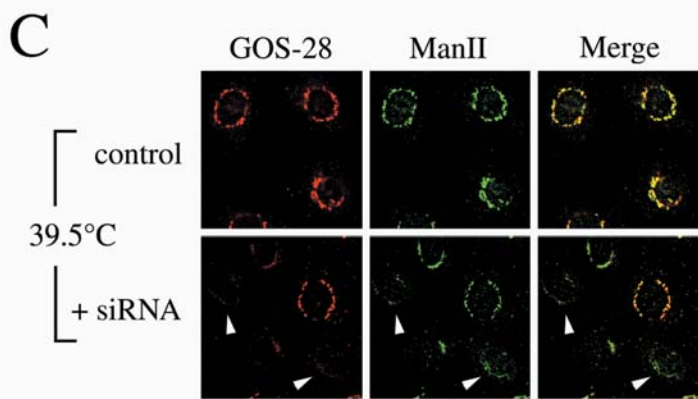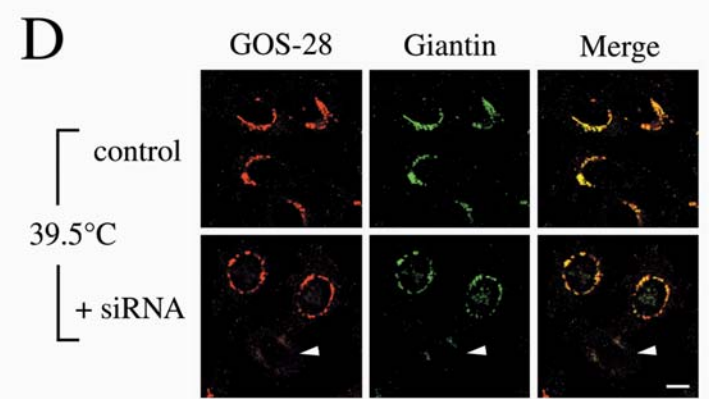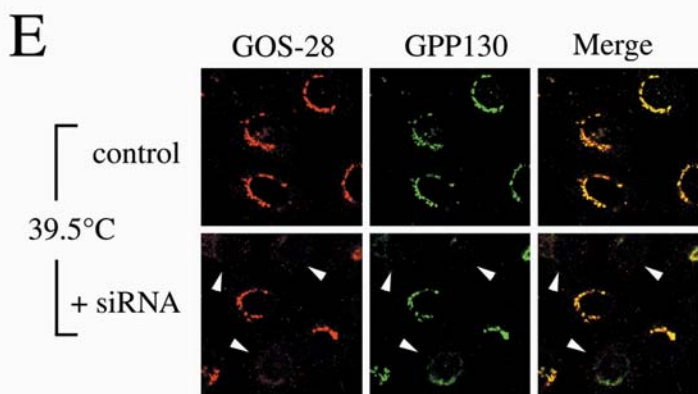

Supplement: mbc_15_5_2423__3.pdf [file mbc_15_5_2423__3.pdf]
